# Supplementary material for: Prolonged recovery time after eruptive disturbance of a deep-sea hydrothermal vent community
Source: PubMed Central journal article supplement (PMC7779506; doi:10.1098/rspb.2020.2070), 2020-12-23
Supplement: rspb20202070_review_history.pdf [file rspb20202070_review_history.pdf]

## Prolonged recovery time after eruptive disturbance of a deep-sea hydrothermal vent community

L. S. Mullineaux, S. W. Mills, N. Le Bris, S. E. Beaulieu, S. M. Sievert and L. N. Dykman

### Article citation details

*Proc. R. Soc. B* **287**: 20202070.

<http://dx.doi.org/10.1098/rspb.2020.2070>

### Review timeline

Original submission: 23 August 2020  
1st revised submission: 29 October 2020  
2nd revised submission: 27 November 2020  
Final acceptance: 27 November 2020

Note: Reports are unedited and appear as submitted by the referee. The review history appears in chronological order.

## Review History

### RSPB-2020-2070.R0 (Original submission)

#### Review form: Reviewer 1

##### Recommendation

Accept with minor revision (please list in comments)

**Scientific importance: Is the manuscript an original and important contribution to its field?**

Excellent

**General interest: Is the paper of sufficient general interest?**

Excellent

**Quality of the paper: Is the overall quality of the paper suitable?**

Excellent

**Is the length of the paper justified?**

Yes

**Should the paper be seen by a specialist statistical reviewer?**

No

**Do you have any concerns about statistical analyses in this paper? If so, please specify them explicitly in your report.**

Yes

**It is a condition of publication that authors make their supporting data, code and materials available - either as supplementary material or hosted in an external repository. Please rate, if applicable, the supporting data on the following criteria.**

**Is it accessible?**

No

**Is it clear?**

Yes

**Is it adequate?**

Yes

**Do you have any ethical concerns with this paper?**

No

### **Comments to the Author**

The MS showed the long-term oscillation of the faunal community structure in deep-sea hydrothermal vent field where faces mining impact in the global seafloor. The MS provides very important knowledge that the community does not reach a plateau or recover within a few years after a disturbance that has been known from 1990s, but keeps changing, based on the long-term monitoring after natural disturbance in the eastern Pacific hydrothermal vent fields. Their findings are not only scientifically but socially or politically important to elucidate deep-sea ecosystem, which occupies more than 90% of the earth's biosphere. We need to re-think the meanings of the word "resilience", under the metacommunity perspectives.

I agreed with the advocates of the MS and I would encourage the authors to process their datasets a bit more to be understood easily. For example, just to plot environmental parameters on nMDS may help the reader to understand the contribution of temperature or duration after the eruption to the community composition.

Although it is not based on the direct observation, a model also predicts that it takes more than 40 years to recover 70% of the community, in the western Pacific. The following paper may help the discussion by the authors;

Suzuki, K., Yoshida, K., Watanabe, H., & Yamamoto, H. (2018). Mapping the resilience of chemosynthetic communities in hydrothermal vent fields. *Scientific reports*, 8(1), 1-8.

Some detailed comments are follows;

Line 148 - 155: Although nMDS provides easy-to-understand graphics, the placement of each community may sometimes be distorted in 2-D ordination. Similarity index for each paired community may help the reader to confirm that the nMDS plot represents the similarity of faunal composition, and I would suggest the authors to provide the similarity index matrix, as a Supplemental data.

Line 155 - 156: I expect that there are benthic copepods or other multi-cellular meiofauna on the sandwiches but they are not found in Supplementary Data Table 1. Were they not there? Or they escaped during the recovery of the sandwiches, or removed from the analyses?

Line 187 - 188: I found the dataset at the following URLs;  
<https://www.bco-dmo.org/dataset/733210/data>

<https://www.bco-dmo.org/dataset/733173/data>

It may be better to show the direct link of the datasets, instead of showing the home of the database.

Line 271: If the authors would like to focus on “evenness” of the community, it would be better to help to discuss more details by showing bar graphs of species composition of each sandwich and/or evenness index (e.g. Pielou’s J’) with species richness, or just the diversity index that takes into account both species richness and evenness (e.g. Shannon index).

Figure 2: A few unexpected lines were placed around Fig. 2a.

Supplementary Data Table 1: “Date” may be "Month", as in the main text.

## Review form: Reviewer 2

### Recommendation

Accept as is

**Scientific importance: Is the manuscript an original and important contribution to its field?**

Excellent

**General interest: Is the paper of sufficient general interest?**

Acceptable

**Quality of the paper: Is the overall quality of the paper suitable?**

Excellent

**Is the length of the paper justified?**

Yes

**Should the paper be seen by a specialist statistical reviewer?**

No

**Do you have any concerns about statistical analyses in this paper? If so, please specify them explicitly in your report.**

No

**It is a condition of publication that authors make their supporting data, code and materials available - either as supplementary material or hosted in an external repository. Please rate, if applicable, the supporting data on the following criteria.**

**Is it accessible?**

Yes

**Is it clear?**

Yes

**Is it adequate?**

Yes

**Do you have any ethical concerns with this paper?**

No

### Comments to the Author

In "Prolonged recovery time after eruptive disturbance of a deep-sea hydrothermal vent community" the authors provide an unprecedented and unparalleled analysis of recovery and community succession of a hydrothermal vent ecosystem following catastrophic natural disturbance. This is an important and timely study as the deep-sea mining industry advances towards production. There are no major methodological or analytical issues with this paper. This study is representative of best-in-class research on disturbance and resilience at deep-sea hydrothermal vents and will be an important addition to the scientific literature. It is acceptable without any revisions.

I have only a few small notes: The rarefaction curves on figure 4: e and f are difficult to read as they are forced into the same scale as 4: d. A series of papers led by Sen and Fisher on community succession at Lau Basin hydrothermal vents that shows relative stability (i.e. <https://aslopubs.onlinelibrary.wiley.com/doi/abs/10.4319/lo.2014.59.5.1510>) might serve as a useful reference to include in the discussion.

## Decision letter (RSPB-2020-2070.R0)

28-Sep-2020

Dear Dr Mullineaux:

Your manuscript has now been peer reviewed and the reviews have been assessed by an Associate Editor. The reviewers' comments (not including confidential comments to the Editor) and the comments from the Associate Editor are included at the end of this email for your reference. As you will see, the reviewers and the Editors have raised some concerns with your manuscript and we would like to invite you to revise your manuscript to address them. One of the concerns was the availability of the data. Acceptance of your ms will rely on the data being placed in an appropriate data repository.

We do not allow multiple rounds of revision so we urge you to make every effort to fully address all of the comments at this stage. If deemed necessary by the Associate Editor, your manuscript will be sent back to one or more of the original reviewers for assessment. If the original reviewers are not available we may invite new reviewers. Please note that we cannot guarantee eventual acceptance of your manuscript at this stage.

To submit your revision please log into <http://mc.manuscriptcentral.com/prsb> and enter your Author Centre, where you will find your manuscript title listed under "Manuscripts with Decisions." Under "Actions", click on "Create a Revision". Your manuscript number has been appended to denote a revision.

When submitting your revision please upload a file under "Response to Referees" - in the "File Upload" section. This should document, point by point, how you have responded to the reviewers' and Editors' comments, and the adjustments you have made to the manuscript. We require a copy of the manuscript with revisions made since the previous version marked as 'tracked changes' to be included in the 'response to referees' document.

Your main manuscript should be submitted as a text file (doc, txt, rtf or tex), not a PDF. Your figures should be submitted as separate files and not included within the main manuscript file.

When revising your manuscript you should also ensure that it adheres to our editorial policies (<https://royalsociety.org/journals/ethics-policies/>). You should pay particular attention to the following:

#### Research ethics:

If your study contains research on humans please ensure that you detail in the methods section whether you obtained ethical approval from your local research ethics committee and gained informed consent to participate from each of the participants.

#### Use of animals and field studies:

If your study uses animals please include details in the methods section of any approval and licences given to carry out the study and include full details of how animal welfare standards were ensured. Field studies should be conducted in accordance with local legislation; please include details of the appropriate permission and licences that you obtained to carry out the field work.

#### Data accessibility and data citation:

It is a condition of publication that you make available the data and research materials supporting the results in the article. Please see our Data Sharing Policies (<https://royalsociety.org/journals/authors/author-guidelines/#data>). Datasets should be deposited in an appropriate publicly available repository and details of the associated accession number, link or DOI to the datasets must be included in the Data Accessibility section of the article (<https://royalsociety.org/journals/ethics-policies/data-sharing-mining/>). Reference(s) to datasets should also be included in the reference list of the article with DOIs (where available).

In order to ensure effective and robust dissemination and appropriate credit to authors the dataset(s) used should also be fully cited and listed in the references.

If you wish to submit your data to Dryad (<http://datadryad.org/>) and have not already done so you can submit your data via this link [http://datadryad.org/submit?journalID=RSPB&manu=\(Document not available\)](http://datadryad.org/submit?journalID=RSPB&manu=(Document not available)), which will take you to your unique entry in the Dryad repository.

If you have already submitted your data to dryad you can make any necessary revisions to your dataset by following the above link.

For more information please see our open data policy <http://royalsocietypublishing.org/data-sharing>.

#### Electronic supplementary material:

All supplementary materials accompanying an accepted article will be treated as in their final form. They will be published alongside the paper on the journal website and posted on the online figshare repository. Files on figshare will be made available approximately one week before the accompanying article so that the supplementary material can be attributed a unique DOI. Please try to submit all supplementary material as a single file.

Online supplementary material will also carry the title and description provided during submission, so please ensure these are accurate and informative. Note that the Royal Society will not edit or typeset supplementary material and it will be hosted as provided. Please ensure that the supplementary material includes the paper details (authors, title, journal name, article DOI). Your article DOI will be 10.1098/rspb.[paper ID in form xxxx.xxxx e.g. 10.1098/rspb.2016.0049].

Please submit a copy of your revised paper within three weeks. If we do not hear from you within this time your manuscript will be rejected. If you are unable to meet this deadline please let us know as soon as possible, as we may be able to grant a short extension.

Thank you for submitting your manuscript to Proceedings B; we look forward to receiving your revision. If you have any questions at all, please do not hesitate to get in touch.

Best wishes,  
 Dr Daniel Costa  
 mailto: proceedingsb@royalsociety.org

Reviewer(s)' Comments to Author:

Referee: 1

Comments to the Author(s)

The MS showed the long-term oscillation of the faunal community structure in deep-sea hydrothermal vent field where faces mining impact in the global seafloor. The MS provides very important knowledge that the community does not reach a plateau or recover within a few years after a disturbance that has been known from 1990s, but keeps changing, based on the long-term monitoring after natural disturbance in the eastern Pacific hydrothermal vent fields. Their findings are not only scientifically but socially or politically important to elucidate deep-sea ecosystem, which occupies more than 90% of the earth's biosphere. We need to re-think the meanings of the word "resilience", under the metacommunity perspectives.

I agreed with the advocates of the MS and I would encourage the authors to process their datasets a bit more to be understood easily. For example, just to plot environmental parameters on nMDS may help the reader to understand the contribution of temperature or duration after the eruption to the community composition.

Although it is not based on the direct observation, a model also predicts that it takes more than 40 years to recover 70% of the community, in the western Pacific. The following paper may help the discussion by the authors;

Suzuki, K., Yoshida, K., Watanabe, H., & Yamamoto, H. (2018). Mapping the resilience of chemosynthetic communities in hydrothermal vent fields. *Scientific reports*, 8(1), 1-8.

Some detailed comments are follows;

Line 148 – 155: Although nMDS provides easy-to-understand graphics, the placement of each community may sometimes be distorted in 2-D ordination. Similarity index for each paired community may help the reader to confirm that the nMDS plot represents the similarity of faunal composition, and I would suggest the authors to provide the similarity index matrix, as a Supplemental data.

Line 155 – 156: I expect that there are benthic copepods or other multi-cellular meiofauna on the sandwiches but they are not found in Supplementary Data Table 1. Were they not there? Or they escaped during the recovery of the sandwiches, or removed from the analyses?

Line 187 – 188: I found the dataset at the following URLs;

<https://www.bco-dmo.org/dataset/733210/data>

<https://www.bco-dmo.org/dataset/733173/data>

It may be better to show the direct link of the datasets, instead of showing the home of the database.

Line 271: If the authors would like to focus on "evenness" of the community, it would be better to help to discuss more details by showing bar graphs of species composition of each sandwich and/or evenness index (e.g. Pielou's J') with species richness, or just the diversity index that takes into account both species richness and evenness (e.g. Shannon index).

Figure 2: A few unexpected lines were placed around Fig. 2a.

Supplementary Data Table 1: "Date" may be "Month", as in the main text.

Referee: 2

Comments to the Author(s)

In "Prolonged recovery time after eruptive disturbance of a deep-sea hydrothermal vent community" the authors provide an unprecedented and unparalleled analysis of recovery and community succession of a hydrothermal vent ecosystem following catastrophic natural disturbance. This is an important and timely study as the deep-sea mining industry advances towards production. There are no major methodological or analytical issues with this paper. This study is representative of best-in-class research on disturbance and resilience at deep-sea hydrothermal vents and will be an important addition to the scientific literature. It is acceptable without any revisions.

I have only a few small notes: The rarefaction curves on figure 4: e and f are difficult to read as they are forced into the same scale as 4: d. A series of papers led by Sen and Fisher on community succession at Lau Basin hydrothermal vents that shows relative stability (i.e. <https://aslopubs.onlinelibrary.wiley.com/doi/abs/10.4319/lo.2014.59.5.1510>) might serve as a useful reference to include in the discussion.

## Author's Response to Decision Letter for (RSPB-2020-2070.R0)

See Appendix A.

## Decision letter (RSPB-2020-2070.R1)

22-Nov-2020

Dear Dr Mullineaux

I am pleased to inform you that your Review manuscript RSPB-2020-2070.R1 entitled "Prolonged recovery time after eruptive disturbance of a deep-sea hydrothermal vent community" has been accepted for publication in Proceedings B.

The referee(s) do not recommend any further changes. Therefore, please proof-read your manuscript carefully and upload your final files for publication. Because the schedule for publication is very tight, it is a condition of publication that you submit the revised version of your manuscript within 7 days. If you do not think you will be able to meet this date please let me know immediately.

To upload your manuscript, log into <http://mc.manuscriptcentral.com/prsb> and enter your Author Centre, where you will find your manuscript title listed under "Manuscripts with Decisions." Under "Actions," click on "Create a Revision." Your manuscript number has been appended to denote a revision.

You will be unable to make your revisions on the originally submitted version of the manuscript. Instead, upload a new version through your Author Centre.

Before uploading your revised files please make sure that you have:

- 1) A text file of the manuscript (doc, txt, rtf or tex), including the references, tables (including captions) and figure captions. Please remove any tracked changes from the text before submission. PDF files are not an accepted format for the "Main Document".
- 2) A separate electronic file of each figure (tiff, EPS or print-quality PDF preferred). The format should be produced directly from original creation package, or original software format. Please note that PowerPoint files are not accepted.
- 3) Electronic supplementary material: this should be contained in a separate file from the main text and the file name should contain the author's name and journal name, e.g. `authorname_procb_ESM_figures.pdf`  
All supplementary materials accompanying an accepted article will be treated as in their final form. They will be published alongside the paper on the journal website and posted on the online figshare repository. Files on figshare will be made available approximately one week before the accompanying article so that the supplementary material can be attributed a unique DOI. Please see: <https://royalsociety.org/journals/authors/author-guidelines/>

#### 4) Data-Sharing and data citation

It is a condition of publication that data supporting your paper are made available. Data should be made available either in the electronic supplementary material or through an appropriate repository. Details of how to access data should be included in your paper. Please see <https://royalsociety.org/journals/ethics-policies/data-sharing-mining/> for more details.

If you wish to submit your data to Dryad (<http://datadryad.org/>) and have not already done so you can submit your data via this link <http://datadryad.org/submit?journalID=RSPB&manu=RSPB-2020-2070.R1> which will take you to your unique entry in the Dryad repository.

If you have already submitted your data to dryad you can make any necessary revisions to your dataset by following the above link.

5) For more information on our Licence to Publish, Open Access, Cover images and Media summaries, please visit <https://royalsociety.org/journals/authors/author-guidelines/>.

Once again, thank you for submitting your manuscript to Proceedings B and I look forward to receiving your final version. If you have any questions at all, please do not hesitate to get in touch.

Sincerely,  
Dr Daniel Costa  
Editor, Proceedings B  
<mailto:proceedingsb@royalsociety.org>

Associate Editor Board Member: 1  
Comments to Author:

The authors have incorporated the comments of the reviewers into the revised ms and all the concerns raised have been addressed. I would add two minor caveats, which can be dealt with at the proof stage: first, that there are references cited in the abstract, which is not journal style. Second, that the abstract should be revised to reflect and emphasise that the results of this study apply to EPR and may not be extendable to hydrothermal vents in general (slower spreading ridges may be even slower to recover!). This is a welcome and timely contribution to PRSB.

Julia Sigwart



## Decision letter (RSPB-2020-2070.R2)

27-Nov-2020

Dear Dr Mullineaux

I am pleased to inform you that your manuscript entitled "Prolonged recovery time after eruptive disturbance of a deep-sea hydrothermal vent community" has been accepted for publication in Proceedings B.

You can expect to receive a proof of your article from our Production office in due course, please check your spam filter if you do not receive it. PLEASE NOTE: you will be given the exact page length of your paper which may be different from the estimation from Editorial and you may be asked to reduce your paper if it goes over the 10 page limit.

If you are likely to be away from e-mail contact please let us know. Due to rapid publication and an extremely tight schedule, if comments are not received, we may publish the paper as it stands.

If you have any queries regarding the production of your final article or the publication date please contact [procb\\_proofs@royalsociety.org](mailto:procb_proofs@royalsociety.org)

Your article has been estimated as being 8 pages long. Our Production Office will be able to confirm the exact length at proof stage.

### Open Access

You are invited to opt for Open Access, making your freely available to all as soon as it is ready for publication under a CCBY licence. Our article processing charge for Open Access is £1700.

Corresponding authors from member institutions

(<http://royalsocietypublishing.org/site/librarians/allmembers.xhtml>) receive a 25% discount to these charges. For more information please visit <http://royalsocietypublishing.org/open-access>.

### Paper charges

An e-mail request for payment of any related charges will be sent out shortly. The preferred payment method is by credit card; however, other payment options are available.

### Electronic supplementary material:

All supplementary materials accompanying an accepted article will be treated as in their final form. They will be published alongside the paper on the journal website and posted on the online figshare repository. Files on figshare will be made available approximately one week before the accompanying article so that the supplementary material can be attributed a unique DOI.

You are allowed to post any version of your manuscript on a personal website, repository or preprint server. However, the work remains under media embargo and you should not discuss it with the press until the date of publication. Please visit <https://royalsociety.org/journals/ethics-policies/media-embargo> for more information.

Thank you for your fine contribution. On behalf of the Editors of the Proceedings B, we look forward to your continued contributions to the Journal.

Sincerely,

Editor, Proceedings B

<mailto:proceedingsb@royalsociety.org>

## Appendix A

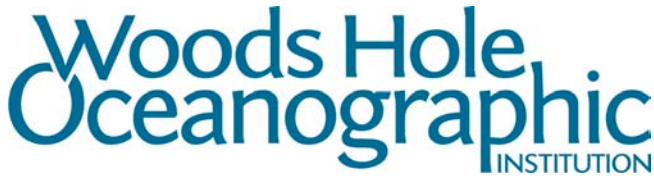

**Lauren S. Mullineaux**, *Senior Scientist*

Biology Department, MS# 38

266 Woods Hole Road, Woods Hole, MA 02543

Office: 508 289-2898 | [lmullineaux@whoi.edu](mailto:lmullineaux@whoi.edu)

[web.whoi.edu/mullineaux](http://web.whoi.edu/mullineaux)

26 October 2020

Dan Costa  
Associate Editor, *Proceedings of the Royal Society B*

Dear Dr. Costa,

My coauthors and I are pleased to submit this revision of our manuscript 'Prolonged recovery after eruptive disturbance of a deep-sea hydrothermal vent' to *Proceedings of the Royal Society B*. The reviews were very helpful and we responded to all the comments (details below).

Thank you for your consideration,

A handwritten signature in black ink, appearing to read "Lauren Mullineaux".

Lauren Mullineaux  
Senior Scientist

### Responses to Referees:

Referee: 1

*I would encourage the authors to process their datasets a bit more to be understood easily.*

Fig 4: We decided to plot temperature on the nMDS, as it was the one environmental measurement directly coupled to each colonization surface

*A model also predicts that it takes more than 40 years to recover 70% of the community, in the western Pacific.*

Line 80 and References: We now cite Suzuki et al (2018) in the Introduction

*Although nMDS provides easy-to-understand graphics, the placement of each community may sometimes be distorted in 2-D ordination.*

Table 3: We include a Pearson's correlation matrix for each nMDS plot as Supplementary Data

*I expect that there are benthic copepods or other multi-cellular meiofauna on the sandwiches but they are not found in Supplementary Data Table 1.*

Line 145: Meiofauna were indeed found on the sandwiches, but were not included in analyses because they were not reliably quantified by our techniques – e.g., they were too mobile or small to recover reliably, or were outside our taxonomic expertise.

*Show the direct link of the datasets, instead of showing the home of the database.*

Line 190: The datasets are now published and we include the DOIs in the text

*If the authors would like to focus on “evenness” of the community, it would be better to help to discuss more details ... (e.g. Shannon index).*

Line 274: We realize this section was unclear and revised to emphasize that over the course of succession, species had replaced each other, so even though diversity did not increase after ~2 years, the composition of the community continued to change. We calculated Shannon H for pooled data from each recovery date and zone, but decided not to include because it provided no additional insight beyond the rarefaction curves.

*A few unexpected lines were placed around Fig. 2a.*

Fig 2: We spruced up panel alignment and line widths in Fig. 2 a, and removed extra lines

*Supplementary Data Table 1: “Date” may be “Month”, as in the main text.*

Table 1: We changed the Column label to ‘Month’

Referee: 2

*The rarefaction curves on figure 4: e and f are difficult to read as they are forced into the same scale as 4: d.*

Fig. 4: We need to keep the horizontal scale consistent across panels 4 e, d, and f, but have now stretched the horizontal axis of all three to make the patterns in e and f more visible

*A series of papers led by Sen and Fisher on community succession at Lau Basin hydrothermal vents that shows relative stability might serve as a useful reference*

Line 82 and References: We agree. We found a similar example for MAR (Copley et al. 2007) and now cite both that paper and Sen et al 2014
